# Supplementary material for: Synthesis, structure and highly selective C3H8/CH4 and C2H6/CH4 adsorption of a (4,8)-c ternary flu-metal–organic framework based upon both [Sc4O2(COO)8] and [Cu4OCl6] clusters
Source: Royal Society of Chemistry journal article supplement (doi:10.1039/d2ce00133k), 2022-01-01
Supplement: d2ce00133k1.pdf [file d2ce00133k1.pdf]

## Supplementary Information

### Synthesis, Structure and Highly Selective C<sub>3</sub>H<sub>8</sub>/CH<sub>4</sub> and C<sub>2</sub>H<sub>6</sub>/CH<sub>4</sub> Adsorptions of a (4,8)-c Ternary *flu*-Metal-organic Framework based upon both [Sc<sub>4</sub>O<sub>2</sub>(COO)<sub>8</sub>] and [Cu<sub>4</sub>OCl<sub>6</sub>] Clusters

Min Ding<sup>a</sup>, Qian Wang<sup>\*a,b</sup>, Hongtao Cheng<sup>a</sup>, and Junfeng Bai<sup>\*a</sup>

<sup>a</sup> Key Laboratory of Applied Surface and Colloid Chemistry, Ministry of Education, School of Chemistry & Chemical Engineering, Shaanxi Normal University, Xi'an 710062, PR China

<sup>b</sup> State Key Laboratory of Coordination Chemistry, School of Chemistry & Chemical Engineering, Nanjing University, Nanjing 210093, PR China.

**General procedures.** All reagents were obtained from commercial vendors and, unless otherwise noted, were used without further purification. Elemental analysis (C, H, N) were carried out with an Elementar Vario EL III. The IR spectra were obtained in the 4000~400 cm<sup>-1</sup> on a Bruker Tensor27 spectrometer using KBr pellets. Thermal gravimetric analyses (TGA) were performed under N<sub>2</sub> atmosphere (100 ml/min) with a heating rate of 5 °C/min using a Beijing Henven HTG-1 thermogravimetric analyzer. Powder X-ray diffraction (PXRD) data were collected on a Bruker D8 ADVANCE X-ray diffractometer with Cu K $\alpha$  radiation. The content of metal ions in MOF sample were carried out with Optima 5300 DV ICP.

**Synthesis of [Sc<sub>4</sub>O<sub>2</sub>(Cu<sub>4</sub>Cl<sub>6</sub>O)<sub>2</sub>(L)<sub>8</sub>·5H<sub>2</sub>O]·xGuest (SNNU-Bai69).** A solution of ScCl<sub>3</sub>·6H<sub>2</sub>O (10.0 mg, 0.04 mmol) and Cu(NO<sub>3</sub>)<sub>2</sub>·3H<sub>2</sub>O (18.0 mg, 0.07 mmol) in 2.0 mL of acetonitrile was added in the solution of isonicotinic acid (HL, 5.0 mg, 0.04 mmol) in 1.2 mL of N,N'-dimethylformamide with stirring. The mixture was sealed in a Pyrex tube and heated to 120 °C for 24h. The yellow block crystals obtained were filtered and washed with DMF. Yield (based on HL) = 68%.

**Sample activation.** The as-synthesized sample of SNNU-Bai69 was soaked in CH<sub>2</sub>Cl<sub>2</sub> for 3 days with CH<sub>2</sub>Cl<sub>2</sub> refreshing every 8 hours. Then, the CH<sub>2</sub>Cl<sub>2</sub>-exchanged sample was activated at 30 °C for 2h, 50 °C for 0.5 h and 65 °C for 8 hours under vacuum to give the yellow block activated SNNU-Bai69, [Sc<sub>4</sub>O<sub>2</sub>(Cu<sub>4</sub>Cl<sub>6</sub>O)<sub>2</sub>(L)<sub>8</sub>·5H<sub>2</sub>O]. Elemental analysis (%) calcd. for C<sub>48</sub>H<sub>42</sub>Cl<sub>12</sub>Cu<sub>8</sub>N<sub>8</sub>O<sub>25</sub>Sc<sub>4</sub> (activated

SNNU-Bai69): C 25.69, H 1.89, N 4.99; found: C 25.36, H 3.84, N 5.21. ICP (ppm): Sc, 6.813; Cu, 19.342.

**X-ray crystallography.** Single-crystal X-ray diffraction data were measured on a Bruker D8 Venture at 153 K using graphite monochromated Cu/K $\alpha$  radiation ( $\lambda = 1.54178 \text{ \AA}$ ). Data reduction was made with the Bruker SAINT program. The structures were solved by direct methods and refined with full-matrix least squares technique using the SHELXTL package<sup>[1]</sup>. Non-hydrogen atoms were refined with anisotropic displacement parameters during the final cycles. Organic hydrogen atoms were placed in calculated positions with isotropic displacement parameters set to  $1.2 \times U_{eq}$  of the attached atom. The unit cell includes a large region of disordered solvent molecules, which could not be modelled as discrete atomic sites. We employed PLATON/SQUEEZE<sup>[2]</sup> to calculate the diffraction contribution of the solvent molecules and, thereby, to produce a set of solvent-free diffraction intensities; the structure was then refined again using the data generated. A summary of the crystallographic data is given in Table S1. CCDC 2142041 contains the supplementary crystallographic data for SNNU-Bai69.

**Table S1.** Crystallographic Data of SNNU-Bai69

| MOFs                                       | SNNU-Bai69                                                                                                      |
|--------------------------------------------|-----------------------------------------------------------------------------------------------------------------|
| Empirical formula                          | C <sub>48</sub> H <sub>42</sub> Cl <sub>12</sub> Cu <sub>8</sub> N <sub>8</sub> O <sub>25</sub> Sc <sub>4</sub> |
| Formula weight                             | 2244.46                                                                                                         |
| T [K]                                      | 153(2)                                                                                                          |
| Wavelength [Å]                             | 1.54178                                                                                                         |
| Crystal system                             | Triclinic                                                                                                       |
| Space group                                | <i>P</i> <sub>1</sub>                                                                                           |
| a [Å]                                      | 19.6298(1)                                                                                                      |
| b [Å]                                      | 20.2011(1)                                                                                                      |
| c [Å]                                      | 20.3398(1)                                                                                                      |
| $\alpha$ [deg]                             | 82.881(2)                                                                                                       |
| $\beta$ [deg]                              | 78.746(2)                                                                                                       |
| $\gamma$ [deg]                             | 87.263(2)                                                                                                       |
| V [Å <sup>3</sup> ]                        | 7847.2(8)                                                                                                       |
| Z                                          | 2                                                                                                               |
| $\rho_{\text{calc}}$ [g cm <sup>-3</sup> ] | 0.95                                                                                                            |
| $\mu$ [mm <sup>-1</sup> ]                  | 4.740                                                                                                           |
| F(000)                                     | 2212                                                                                                            |
| Crystal size [mm <sup>3</sup> ]            | 0.11 × 0.08 × 0.05                                                                                              |
| Theta range [deg]                          | 2.20 – 61.41                                                                                                    |
| Limiting indices                           | -21 ≤ h ≤ 22                                                                                                    |

|                                                             |                         |
|-------------------------------------------------------------|-------------------------|
|                                                             | -22 ≤ k ≤ 22            |
|                                                             | -22 ≤ l ≤ 19            |
| Reflections collected                                       | 62440                   |
| Reflections unique                                          | 23269 [R(int) = 0.0676] |
| Completeness                                                | 95.8 %                  |
| Data/restraints/parameters                                  | 23269 / 0 / 951         |
| Goodness-of-fit on F <sup>2</sup>                           | 1.066                   |
| R1, wR2 <sup>a</sup> [I > 2σ(I)]                            | 0.0695, 0.2168          |
| R1, wR2 <sup>a</sup> [all data]                             | 0.0837, 0.2312          |
| Δρ <sub>max</sub> / Δρ <sub>min</sub> [e. Å <sup>-3</sup> ] | -0.731 / 1.282          |

<sup>a</sup> R1 =  $\Sigma||F_o| - |F_c||/|F_o|$ ; wR2 =  $[\Sigma w(\Sigma F_o^2 - F_c^2)^2 / \Sigma w(F_o^2)^2]^{1/2}$ .

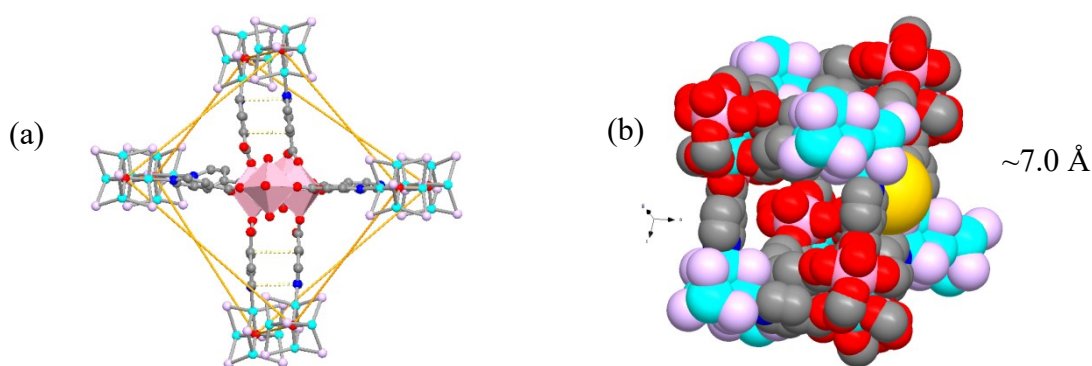

**Figure S1.** (a) The  $\pi$ ... $\pi$  stacking role between two couples of neighbouring isonicotinic acids around the torsional cubic 8-c  $\text{Sc}_4\text{O}_2(\text{COO})_8$  cluster and (b) the pore size of 1D pore channel in SNNU-Bai69. H atoms have been omitted for clarity.

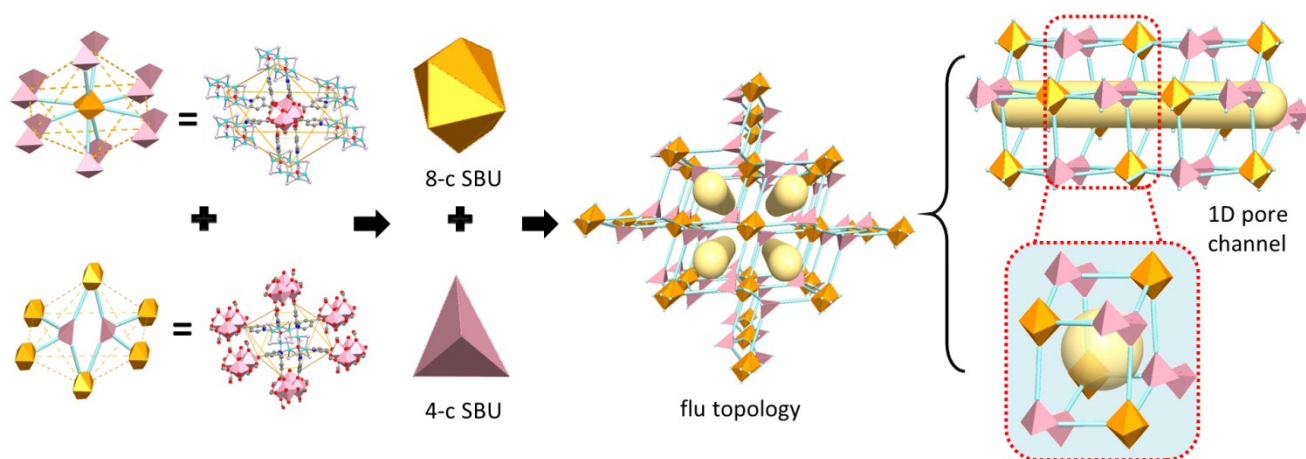

**Figure S2.** The simplification of *flu* topological network of SNNU-Bai69 with the point symbol of  $\{4^{12}.6^{12}.8^4\} \{4^6\}_2$ .

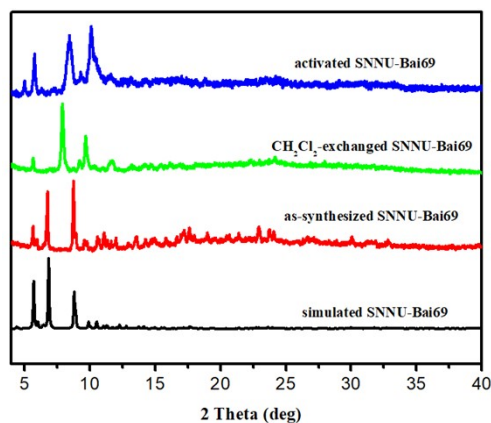

**Figure S3.** The simulated and experimental PXRD patterns of SNNU-Bai69.

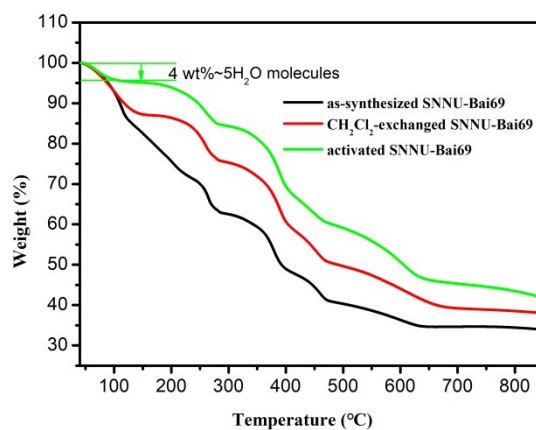

**Figure S4.** TGA curves of as-synthesized (black),  $\text{CH}_2\text{Cl}_2$ -exchanged and activated (green) of SNNU-Bai69. The weight loss of 4 wt% of activated SNNU-Bai69 at 100 °C is attributed to five coordinated  $\text{H}_2\text{O}$  molecules on two  $\text{Sc}^{3+}$  ions. Note: Due to the rapid volatilization of MeCN and  $\text{CH}_2\text{Cl}_2$  solvent in the pore channels of as-synthesized and  $\text{CH}_2\text{Cl}_2$ -exchanged SNNU-Bai69, respectively, the loss weight before 100 °C are not able to indicate the real loss weight of MeCN and  $\text{CH}_2\text{Cl}_2$  solvent in the pore channels.

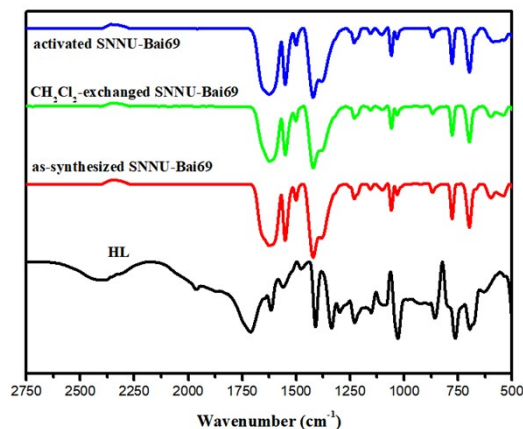

**Figure S5.** Infrared spectra of ligand (black), as-synthesized (red),  $\text{CH}_2\text{Cl}_2$ -exchanged (green), and activated (blue) of SNNU-Bai69.

**Gas sorption measurements.** Low-pressure adsorption isotherms of N<sub>2</sub> (99.999%), C<sub>3</sub>H<sub>8</sub> (99.99%), C<sub>2</sub>H<sub>6</sub> (99.999%) and CH<sub>4</sub> (99.999%) gases were performed on Micromeritics 3Flex surface area and pore size analyzer. Before analysis, about 50 mg samples were activated by using the “outgas” function of the surface area analyzer. For all isotherms, ultra-high purity He gas (UHP grade 5.0, 99.999% purity) was used for the estimation of the free space (warm and cold), assuming that it is not adsorbed at any of the studied temperatures. The specific surface areas were determined using the Brunauer-Emmett-Teller (BET) and the Langmuir equation from the N<sub>2</sub> sorption data at 77 K. When applying the BET theory, we made sure that our analysis satisfied the two consistency criteria as detailed by Walton and co-workers.<sup>[3]</sup> For the Langmuir surface area, data from the whole adsorption data were used.

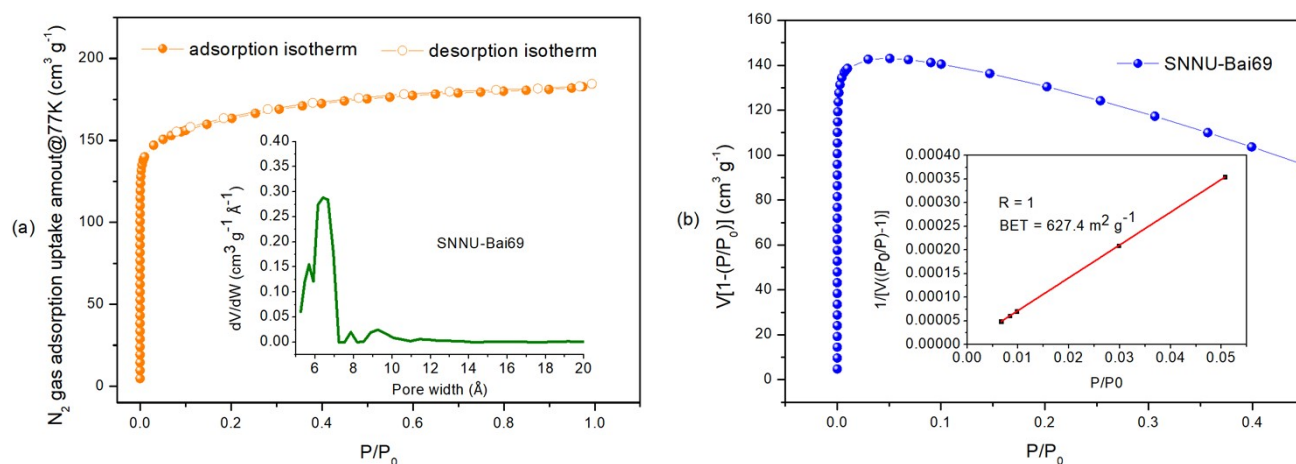

**Figure S6.** (a) The N<sub>2</sub> adsorption isotherms at 77 K (Inset: DFT pore size distribution plot) and (b)  $V[1-(P/P_0)]$  vs.  $P/P_0$  for SNNU-Bai69, only the range below  $P/P_0 = 0.04$  satisfies the first consistency criterion for applying the BET theory (Inset: Plot of the linear region for the BET equation).

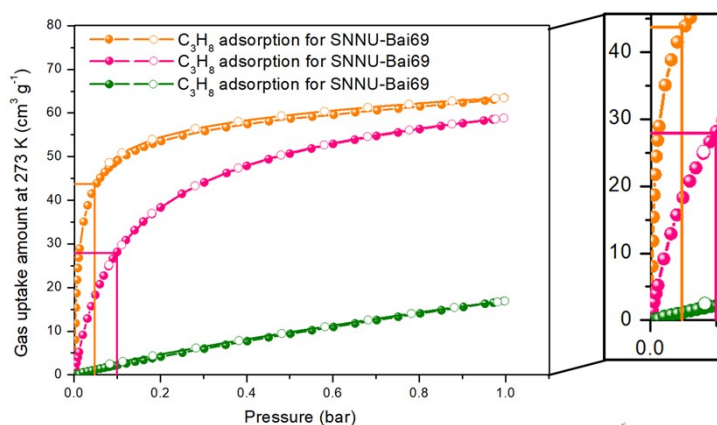

**Figure S7.** The C<sub>3</sub>H<sub>8</sub>, C<sub>2</sub>H<sub>6</sub> and CH<sub>4</sub> adsorption isotherms for SNNU-Bai69 at 273 K (right, the enlarged view of gas adsorption isotherms at ultra-low pressures); Filled and open symbols represent adsorption and desorption, respectively.

**Estimation of the isosteric heats of gas adsorption.** A virial-type<sup>[4]</sup> expression comprising the temperature-independent parameters  $a_i$  and  $b_j$  was employed to calculate the enthalpies of adsorption for C<sub>3</sub>H<sub>8</sub>, C<sub>2</sub>H<sub>6</sub> and CH<sub>4</sub> (at 273 and 298 K) of activated SNNU-Bai69. In each case, the data were fitted using the equation:

$$\ln P = \ln N + 1/T \sum_{i=0}^m a_i N^i + \sum_{j=0}^n b_j N^j \quad (1)$$

Here,  $P$  is the pressure expressed in Torr,  $N$  is the amount adsorbed in mmol/g,  $T$  is the temperature in K,  $a_i$  and  $b_j$  are virial coefficients, and  $m$ ,  $n$  represent the number of coefficients required to adequately describe the isotherms ( $m$  and  $n$  were gradually increased until the contribution of extra added  $a$  and  $b$  coefficients was deemed to be statistically insignificant towards the overall fit, and the average value of the squared deviations from the experimental values was minimized). The values of the virial coefficients  $a_0$  through  $a_m$  were then used to calculate the isosteric heat of adsorption using the following expression.

$$Q_{st} = -R \sum_{i=0}^m a_i N^i \quad (2)$$

$Q_{st}$  is the coverage-dependent isosteric heat of adsorption and  $R$  is the universal gas constant. The heat of C<sub>3</sub>H<sub>8</sub>, C<sub>2</sub>H<sub>6</sub> and CH<sub>4</sub> sorption for activated SNNU-Bai69 in the manuscript are determined by using the sorption data measured in the pressure range from 0-1 bar (273 and 298 K), which is fitted by the virial-equation very well ( $R^2 > 0.9999$ ).

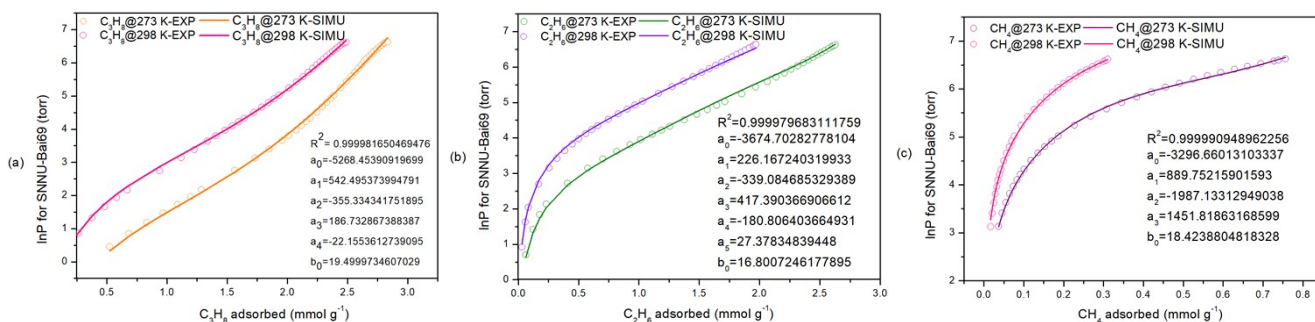

**Figure S8.** The details of virial equation (solid lines) fitting to the experimental C<sub>3</sub>H<sub>8</sub> (a), C<sub>2</sub>H<sub>6</sub> (b), and CH<sub>4</sub> (c) adsorption data (symbols) for activated SNNU-Bai69.

**Prediction of the Gas Adsorption Selectivity by IAST.** IAST (ideal adsorption solution theory)<sup>[5]</sup> was used to predict binary mixture adsorption from the experimental pure-gas isotherms. In order to perform the integrations required by IAST, the single-component isotherms should be fitted by a proper model. In practice, several methods to do this are available. We found for this set of data that the dual-site Langmuir-Freundlich equation was successful in fitting the data. As can be seen in Figure S9 and Table S2, the model fits the isotherms very well ( $R^2 > 0.9999$ ).

$$q = \frac{q_{m,1} b_1 p^{1/n_1}}{1 + b_1 p^{1/n_1}} + \frac{q_{m,2} b_2 p^{1/n_2}}{1 + b_2 p^{1/n_2}} \quad (3)$$

Here,  $P$  is the pressure of the bulk gas at equilibrium with the adsorbed phase (kPa),  $q$  is the adsorbed amount per mass of adsorbent (mmol/g),  $q_{m,1}$  and  $q_{m,2}$  are the saturation capacities of sites 1 and 2 (mmol/g),  $b_1$  and  $b_2$  are the affinity coefficients of sites 1 and 2 (1/kPa), and  $n_1$  and  $n_2$  represent the deviations from an ideal homogeneous surface. The fitted parameters were then used to predict multi-component adsorption with IAST.

The selectivity  $S_{A/B}$  in a binary mixture of components A and B is defined as  $(x_A/y_A)/(x_B/y_B)$ , where  $x_i$  and  $y_i$  are the mole fractions of component  $i$  ( $i = A, B$ ) in the adsorbed and bulk phases, respectively.

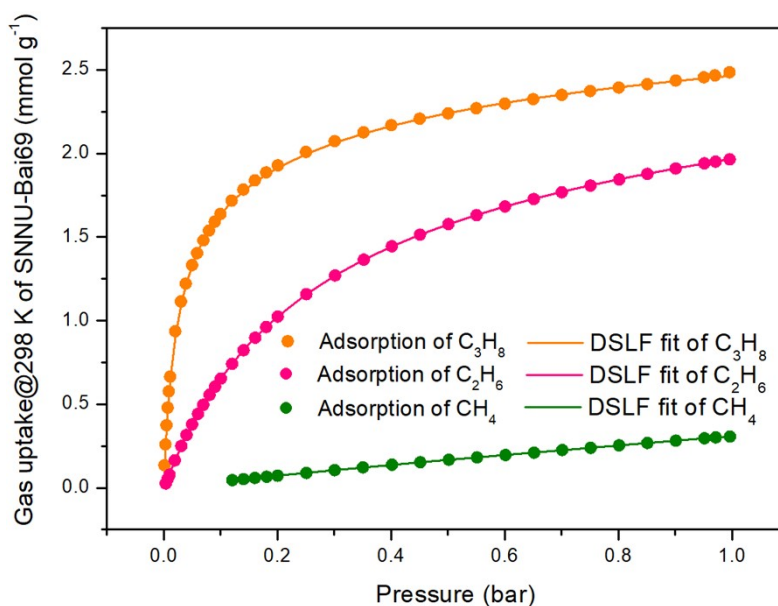

**Figure S9.** Low pressure gas adsorption isotherms and the dual-site Langmuir-Freundlich (DSLFL) fit lines of  $C_3H_8$ ,  $C_2H_6$  and  $CH_4$  in SNNU-Bai69 at 298 K.

**Table S2.** Dual-site Langmuir-Freundlich parameters for pure C<sub>3</sub>H<sub>8</sub>, C<sub>2</sub>H<sub>6</sub> and CH<sub>4</sub> isotherms in activated SNNU-Bai69 at 298 K

|                  | SNNU-Bai69                    |                               |                      |
|------------------|-------------------------------|-------------------------------|----------------------|
|                  | C <sub>3</sub> H <sub>8</sub> | C <sub>2</sub> H <sub>6</sub> | CH <sub>4</sub>      |
| R <sup>2</sup>   | 0.999901252032284             | 0.999992655795133             | 0.999969255620802    |
| q <sub>m,1</sub> | 1.64558891096833              | 2.28209582909371              | 0.00524644304478482  |
| q <sub>m,2</sub> | 1.57618317711217              | 616.954875574045              | 3.43099893472945     |
| b <sub>1</sub>   | 0.0614805318315383            | 0.0405489098007078            | 2.30928362383002E-28 |
| b <sub>2</sub>   | 0.483565594448545             | 2.03105555485444E-06          | 0.0014976922963507   |
| n <sub>1</sub>   | 1.50567705                    | 1.01405966194158              | 0.06932982           |
| n <sub>2</sub>   | 1.054339267                   | 0.944205288808884             | 1.100673544          |

**Breakthrough experiment.** The breakthrough experiments were performed on a gas-separation apparatus which was designed by Xuzhou North Gaorui Electronic Equipment Co., Ltd. In the breakthrough system. All flow rates of all gases can be regulated by the mass flow controllers. According to a protocol established by the literatures,<sup>[6]</sup> the breakthrough curves in this investigation were collected at 298 K. An activated sample of SNNU-Bai69 (653 mg) was packed into a stainless-steel column (0.40 cm internal diameter × 15 cm length) and the remaining volume in the column was filled by glass wool. Helium gas (with a flow rate of 10 mL/min for 20 min) was initially purged into the packed column to ensure that no other gases were detected in the effluent. Then, the desired gas mixture with a flow rate of 10 mL/min (C<sub>3</sub>H<sub>8</sub>/C<sub>2</sub>H<sub>6</sub>/CH<sub>4</sub>: 5/10/85) was dosed into the column. Effluent from the bed was monitored by a gas chromatography (GC). A complete breakthrough of C<sub>3</sub>H<sub>8</sub> or C<sub>2</sub>H<sub>6</sub> gas was defined when the concentration of effluent C<sub>3</sub>H<sub>8</sub> or C<sub>2</sub>H<sub>6</sub> reaches 1% of the feed concentration. Breakthrough time was calculated by subtracting the time to breakthrough based upon a sample bed packed only with stainless steel beads and cotton plugs from the observed breakthrough time. The C<sub>3</sub>H<sub>8</sub> and C<sub>2</sub>H<sub>6</sub> separation capacities were determined by their amounts fed through the bed during the breakthrough time, respectively.<sup>[6a, 6b]</sup>



## Reference

- [1] G. M. Sheldrick, *Acta Crystallogr. Sect. A*, 2008, **64**, 112.
- [2] A. L. Spek, *J. Appl. Crystallogr.*, 2003, **36**, 7.
- [3] a) K. S. Walton and K. S. Snurr, *J. Am. Chem. Soc.*, 2007, **129**, 8552; b) J. Rouquerol, P. Llewellyn and F. Rouquerol, *Stud. Surf. Sci. Catal.*, 2007, **160**, 49.
- [4] J. L. C. Rowsell, O. M. Yaghi, *J. Am. Chem. Soc.* 2006, **128**, 1304.
- [5] a) A. L. Myers, J. M. Prausnitz, *AIChE J.* 1965, **11**, 121; b) Y. S. Bae, K. L. Mulfort, H. Frost, P. Ryan, S. Punnathanam, L. J. Broadbelt, J. T. Hupp, R. Q. Snurr, *Langmuir* 2008, **24**, 8592; c) B. Mu, F. Li, K. S. Walton, *Chem. Commun.* 2009, 2493.
- [6] a) Song, X.; Zhang, M.; Chen, C.; Duan, J.; Zhang, W.; Pan, Y.; Bai, J., *J. Am. Chem. Soc.* 2019, **141**, 14539; b) Song, X.; Zhang, M.; Duan, J.; Bai, J., *Chem. Commun.* 2019, **55**, 3477; c) Bae, Y.-S.; Lee, C. Y.; Kim, K. C.; Farha, O. K.; Nickias, P.; Hupp, J. T.; Nguyen, S. T.; Snurr, R. Q., *Angew. Chem. Int. Ed.* 2012, **51**, 1857.
